# Supplementary material for: Evolution of a Pathogen: A Comparative Genomics Analysis Identifies a Genetic Pathway to Pathogenesis in Acinetobacter
Source: PubMed Central journal article supplement (PMC3554770; doi:10.1371/journal.pone.0054287), 2013-01-24
Supplement: pone.0054287.s003.pdf [file pone.0054287.s003.pdf]

**Table S1.** Details of isolation and assembly of isolates sequenced in this study

| Genome (T)                           | #contigs | N50 (nts) | assembly size (nts) | isolation source       | culture date | accession    | Source* | External ID           |
|--------------------------------------|----------|-----------|---------------------|------------------------|--------------|--------------|---------|-----------------------|
| <i>A. baylyi</i> TG19579             | 95       | 210650    | 3746897             | soil                   | 1961         | AMIC00000000 | ATCC    | 33304                 |
| <i>A. calcoaceticus</i> TG19585      | 34       | 370467    | 3810918             | soil                   | 1952         | AMIW00000000 | ATCC    | 17902                 |
| <i>A. calcoaceticus</i> TG19588      | 31       | 844197    | 3902769             | unknown                | unknown      | AMIX00000000 | ATCC    | 19638                 |
| <i>A. calcoaceticus</i> TG19593      | 29       | 369028    | 3911510             | soil                   | 1962         | AMIY00000000 | ATCC    | 14987                 |
| <i>A. haemolyticus</i> TG19599       | 261      | 36895     | 3386441             | sputum                 | 1962         | AMJA00000000 | ATCC    | 17906                 |
| <i>A. haemolyticus</i> TG19602       | 382      | 35130     | 3578946             | ocular pus             | unknown      | AMJB00000000 | ATCC    | 19002                 |
| <i>A. haemolyticus</i> TG21157       | 175      | 34302     | 3324307             | cervix                 | 1969         | AMJC00000000 | ATCC    | 27244                 |
| <i>A. johnsonii</i> TG19605          | 186      | 58817     | 3532488             | duodenum               | 1962         | AMJD00000000 | ATCC    | 17909                 |
| <i>A. johnsonii</i> TG19625          | 111      | 65492     | 3599403             | Venous catheter        | 1989         | AMJE00000000 | ATCC    | 700472                |
| <i>A. junii</i> TG19608              | 136      | 51258     | 3257504             | urine                  | 1962         | AMJF00000000 | ATCC    | 17908                 |
| <i>A. lwoffii</i> TG19636            | 245      | 41518     | 3497784             | urine                  | 1962         | AMJG00000000 | ATCC    | 17910                 |
| <i>A. nosocomialis</i> TG19596       | 86       | 176764    | 3790318             | unknown                | unknown      | AMIZ00000000 | ATCC    | BAA-347               |
| <i>A. nosocomialis</i> TG21145       | 39       | 399595    | 4103207             | unknown                | 1968         | AMJH00000000 | ATCC    | 17903                 |
| <i>A. pittii</i> TG6411              | 66       | 125920    | 3919746             | sputum                 | 2007         | AMJI00000000 | LSA     | ACBA-36               |
| <i>A. radioresistens</i> TG02010     | 38       | 168129    | 3063804             | blood                  | 2005         | AMJJ00000000 | LSA     | ACBA-2                |
| <i>A. schindleri</i> TG19614         | 159      | 65440     | 3197027             | urine                  | 1998         | AMJK00000000 | ATCC    | BAA-618               |
| <i>A. sp.</i> 528                    | 293      | 35578     | 4051342             | sputum                 | unknown      | AMJL00000000 | ASL     | ID06-528              |
| <i>A. sp.</i> TG19627                | 109      | 159110    | 4524664             | urine                  | 1962         | AMJM00000000 | ATCC    | 17988                 |
| <i>A. sp.</i> TG2027                 | 66       | 242604    | 3927238             | wound                  | 2001         | AMJN00000000 | LSA     | ACBA-27               |
| <i>A. baumannii</i> 1536-8           | 194      | 44122     | 3844188             | unknown                | 2006         | AMHA00000000 | ASL     | ID06-1536             |
| <i>A. baumannii</i> 1582-8           | 253      | 41921     | 4054837             | sputum                 | 2006         | AMHB00000000 | ASL     | ID06-1582             |
| <i>A. baumannii</i> 1583-8           | 322      | 29456     | 3889613             | unknown                | 2006         | AMHC00000000 | ASL     | ID06-1583             |
| <i>A. baumannii</i> 1594-8           | 222      | 40465     | 3973075             | sputum                 | 2006         | AMHD00000000 | ASL     | ID06-1594             |
| <i>A. baumannii</i> 1595-8           | 205      | 44166     | 4070281             | urine                  | 2006         | AMHE00000000 | ASL     | ID06-1595             |
| <i>A. baumannii</i> 1649-8           | 140      | 54971     | 3786021             | sputum                 | 2006         | AMHF00000000 | ASL     | ID06-1649             |
| <i>A. baumannii</i> 1650-8           | 133      | 55744     | 3791740             | hip                    | 2006         | AMHG00000000 | ASL     | ID06-1650             |
| <i>A. baumannii</i> 1766-8           | 222      | 47166     | 4010538             | body fluid             | 2006         | AMJO00000000 | ASL     | ID06-1766             |
| <i>A. baumannii</i> 2007-09-110-01-7 | 274      | 34327     | 3965851             | hospital surface       | 2007         | AMHH00000000 | CDC     | 2007-09-110-01        |
| <i>A. baumannii</i> 2007-16-25-01-7  | 81       | 135573    | 3961436             | hospital surface       | 2007         | AMHI00000000 | CDC     | 2007-16-25-01         |
| <i>A. baumannii</i> 2007-16-27-01    | 71       | 157349    | 3970108             | hospital surface       | 2007         | AMHJ00000000 | CDC     | 2007-16-27-01         |
| <i>A. baumannii</i> 2008-15-34-7     | 157      | 77102     | 3918675             | sputum                 | 2008         | AMHK00000000 | CDC     | 2008-15-34            |
| <i>A. baumannii</i> 2008-15-45       | 140      | 83014     | 4100732             | bronchoalveolar lavage | 2008         | AMHL00000000 | CDC     | 2008-15-45            |
| <i>A. baumannii</i> 2008-15-52       | 104      | 119999    | 3889383             | wound                  | 2008         | AMHM00000000 | CDC     | 2008-15-52            |
| <i>A. baumannii</i> 2008-15-69       | 75       | 127651    | 4136907             | unknown                | 2008         | AMHN00000000 | CDC     | 2008-15-69            |
| <i>A. baumannii</i> 2008-15-70       | 234      | 55952     | 4101914             | tracheal aspirate      | 2008         | AMHO00000000 | CDC     | 2008-15-70            |
| <i>A. baumannii</i> 2008-15-71       | 90       | 140379    | 3886101             | sputum                 | 2008         | AMHP00000000 | CDC     | 2008-15-71            |
| <i>A. baumannii</i> 2008-23-01-01-7  | 116      | 84761     | 4032165             | hospital surface       | 2008         | AMHQ00000000 | CDC     | 2008-23-01-01         |
| <i>A. baumannii</i> 2008-23-07-01-7  | 242      | 39941     | 3995020             | hospital surface       | 2008         | AMHR00000000 | CDC     | 2008-23-07-01         |
| <i>A. baumannii</i> 2009-04-01-7     | 86       | 103749    | 3839270             | wound                  | 2009         | AMHS00000000 | CDC     | 2009-04-01            |
| <i>A. baumannii</i> 2009-04-02-7     | 163      | 55248     | 3972033             | sputum                 | 2009         | AMHT00000000 | CDC     | 2009-04-02            |
| <i>A. baumannii</i> 515-8            | 222      | 42260     | 4077480             | sputum                 | 2006         | AMHU00000000 | ASL     | ID06-515              |
| <i>A. baumannii</i> 908-12           | 115      | 94610     | 3992622             | hospital surface       | 2007         | AMHV00000000 | CDC     | 908-12                |
| <i>A. baumannii</i> 908-13           | 175      | 75548     | 3973172             | urine                  | 2007         | AMHW00000000 | CDC     | 908-13                |
| <i>A. baumannii</i> 908-14-7         | 291      | 31621     | 3850660             | bronchoalveolar lavage | 2007         | AMHX00000000 | CDC     | 908-14                |
| <i>A. baumannii</i> 909-01-7         | 117      | 76009     | 3790690             | blood                  | 2007         | AMHY00000000 | CDC     | 909-01                |
| <i>A. baumannii</i> 909-02-7         | 98       | 138985    | 3929638             | sputum                 | 2007         | AMHZ00000000 | CDC     | 909-02                |
| <i>A. baumannii</i> 909-05           | 181      | 54820     | 4045600             | sputum                 | 2007         | AMIA00000000 | CDC     | 909-05                |
| <i>A. baumannii</i> 909-14-7         | 584      | 12718     | 4006324             | wound                  | 2007         | AMIB00000000 | CDC     | 909-14                |
| <i>A. baumannii</i> TG19582          | 366      | 20533     | 3797693             | unknown                | unknown      | AMIV00000000 | ATCC    | BAA-346               |
| <i>A. baumannii</i> TG19617          | 59       | 335015    | 3890586             | unknown                | unknown      | AMID00000000 | LSA     | ACBA-22               |
| <i>A. baumannii</i> TG2018           | 147      | 84900     | 3975196             | sputum                 | 2006         | AMIE00000000 | LSA     | ACBA-11               |
| <i>A. baumannii</i> TG2022           | 198      | 42438     | 3936090             | blood                  | 2006         | AMIF00000000 | LSA     | ACBA-18               |
| <i>A. baumannii</i> TG2023           | 175      | 49451     | 3944281             | blood                  | 2006         | AMIG00000000 | LSA     | ACBA-20               |
| <i>A. baumannii</i> TG2026           | 691      | 43885     | 4208784             | wound                  | 2006         | AMIH00000000 | LSA     | ACBA-26               |
| <i>A. baumannii</i> TG2028           | 129      | 57768     | 3770742             | sputum                 | 2001         | AMII00000000 | LSA     | VEN-078               |
| <i>A. baumannii</i> TG2030           | 151      | 87911     | 3764392             | sputum                 | 2001         | AMIJ00000000 | LSA     | VEN-98                |
| <i>A. baumannii</i> TG2031           | 75       | 140361    | 3782788             | sputum                 | 2001         | AMIK00000000 | LSA     | VEN-104               |
| <i>A. baumannii</i> TG2032           | 353      | 22057     | 3557150             | sputum                 | 2006         | AMIL00000000 | LSA     | VEN-106               |
| <i>A. baumannii</i> TG2631           | 95       | 107953    | 3881302             | blood                  | 2007         | AMIM00000000 | LSA     | ACBA-28               |
| <i>A. baumannii</i> TG27323          | 103      | 177990    | 3962171             | unknown                | 2005         | AMIN00000000 | ASL     | ID06-0170000521-001-A |
| <i>A. baumannii</i> TG27327          | 104      | 161007    | 4012960             | wound                  | 2005         | AMIO00000000 | ASL     | ID06-0170000523-001-A |
| <i>A. baumannii</i> TG27331          | 148      | 140920    | 4062196             | sputum                 | 2005         | AMIP00000000 | ASL     | ID06-0170000524-001-A |
| <i>A. baumannii</i> TG27335          | 137      | 143627    | 4061401             | unknown                | 2005         | AMIQ00000000 | ASL     | ID06-0170000525-001-A |
| <i>A. baumannii</i> TG27339          | 46       | 235222    | 3971513             | sputum                 | 2005         | AMIR00000000 | ASL     | ID06-0170000526-001-A |
| <i>A. baumannii</i> TG27343          | 182      | 102490    | 4011165             | wound                  | 2005         | AMIS00000000 | ASL     | ID06-0170000527-001-A |
| <i>A. sp.</i> TG27347                | 90       | 133924    | 4016748             | sputum                 | 2005         | AMIT00000000 | ASL     | ID06-0170000528-001-A |
| <i>A. baumannii</i> TG5064           | 471      | 18081     | 3760971             | blood                  | 2007         | AMIU00000000 | LSA     | ACBA-35               |

\*CDC=Centers for Disease Control, ATCC=American Type Culture Collection, ASL=Arizona State Labs, LSA= Laboratory Sciences of Arizona

T = Type strain
