# Supplementary material for: Evolution of a Pathogen: A Comparative Genomics Analysis Identifies a Genetic Pathway to Pathogenesis in Acinetobacter
Source: PubMed Central journal article supplement (PMC3554770; doi:10.1371/journal.pone.0054287), 2013-01-24
Supplement: pone.0054287.s004.pdf [file pone.0054287.s004.pdf]

**Table S2.** Accession details of reference genomes analyzed in this study

| Genome                                  | Accession        |
|-----------------------------------------|------------------|
| <i>A. baumannii</i> AB0057              | NC_011586.1      |
| <i>A. baumannii</i> AB056               | NZ_ADGZ000000000 |
| <i>A. baumannii</i> AB058               | NZ_ADHA000000000 |
| <i>A. baumannii</i> AB059               | NZ_ADHB000000000 |
| <i>A. baumannii</i> 1656-2              | CP001921.1       |
| <i>A. baumannii</i> AB210               | AEOX000000000    |
| <i>A. baumannii</i> AB307-0294          | NC_011595.1      |
| <i>A. baumannii</i> 3909                | AEOZ000000000    |
| <i>A. baumannii</i> 3990                | AEOY000000000    |
| <i>A. baumannii</i> 4190                | AEPA000000000    |
| <i>A. baumannii</i> 4857                | AHAG000000000    |
| <i>A. baumannii</i> 5075                | AHAH000000000    |
| <i>A. baumannii</i> 5256                | AHAI000000000    |
| <i>A. baumannii</i> 5711                | AHAJ000000000    |
| <i>A. baumannii</i> 6013113             | NZ_ACYR000000000 |
| <i>A. baumannii</i> 6013150             | NZ_ACYQ000000000 |
| <i>A. baumannii</i> 6014059             | NZ_ACYS000000000 |
| <i>A. baumannii</i> AB900               | NZ_ABXK000000000 |
| <i>A. baumannii</i> ACICU               | NC_010611.1      |
| <i>A. baumannii</i> MDR-TJ              | AEOE000000000    |
| <i>A. baumannii</i> TCDC-AB0715         | CP002522.1       |
| <i>A. baumannii</i> ATCC 19606          | ACQB000000000    |
| <i>A. baumannii</i> AYE                 | NC_010410.1      |
| <i>A. baumannii</i> UMB001              | AEPK000000000    |
| <i>A. baumannii</i> UMB002              | AEPL000000000    |
| <i>A. baumannii</i> UMB003              | AEPM000000000    |
| <i>A. baumannii</i> A118                | AEOW000000000    |
| <i>A. baumannii</i> ABNIH1              | AFSZ000000000    |
| <i>A. baumannii</i> ABNIH2              | AFTA000000000    |
| <i>A. baumannii</i> ABNIH3              | AFTB000000000    |
| <i>A. baumannii</i> ABNIH4              | AFTC000000000    |
| <i>A. baumannii</i> ATCC 17978          | CP000521.1       |
| <i>A. baumannii</i> D1279779            | AERZ000000000    |
| <i>A. baumannii</i> MDR-ZJ06            | CP001937.1       |
| <i>A. baumannii</i> Naval-18            | AFDA000000000    |
| <i>A. baumannii</i> Naval-81            | AFDB000000000    |
| <i>A. baumannii</i> OIFC032             | AFCZ000000000    |
| <i>A. baumannii</i> W6976               | AIEG000000000    |
| <i>A. baumannii</i> W7282               | AIEH000000000    |
| <i>A. baumannii</i> WM99c               | AERY000000000    |
| <i>A. baumannii</i> SDF                 | NC_010400.1      |
| <i>A. bereziniae</i> LMG 1003           | AIEI000000000    |
| <i>A. calcoaceticus</i> RUH2202         | ACPK000000000    |
| <i>A. calcoaceticus</i> DSM 30006       | AIEC000000000    |
| <i>A. calcoaceticus</i> PHEA-2          | NC_016603.1      |
| <i>A. genomosp.</i> 3 str. DSM 21653    | AIEK000000000    |
| <i>A. genomosp.</i> 3 str. DSM 9306     | AIEF000000000    |
| <i>A. haemolyticus</i> ATCC 19194       | ADMT000000000    |
| <i>A. johnsonii</i> SH046               | ACPL000000000    |
| <i>A. junii</i> SH205                   | ACPM000000000    |
| <i>A. lwoffii</i> NCTC 5866             | AIEL000000000    |
| <i>A. lwoffii</i> SH145                 | ACPN000000000    |
| <i>A. lwoffii</i> WJ10621               | NZ_AFQY000000000 |
| <i>A. genomosp.</i> 13TU str. NCTC 8102 | AIEJ000000000    |
| <i>A. oleivorans</i> DR1                | NC_014259.1      |
| <i>A. parvus</i> DSM 16617              | AIEB000000000    |
| <i>A. pittii</i> D499                   | AGFH000000000    |
| <i>A. radioresistens</i> DSM 6976       | AIDZ000000000    |
| <i>A. radioresistens</i> SK82           | ACVR000000000    |
| <i>A. radioresistens</i> SH164          | ACPO000000000    |
| <i>A. sp.</i> ADP1                      | NC_005966.1      |
| <i>A. sp.</i> ATCC 27244                | ABYN000000000    |
| <i>A. sp.</i> NBRC 100985               | BAEB000000000    |
| <i>A. sp.</i> NCTC 10304                | AIEE000000000    |
| <i>A. sp.</i> NCTC 7422                 | AIED000000000    |
| <i>A. sp.</i> P8-3-8                    | AFIE000000000    |
| <i>A. sp.</i> RUH2624                   | ACQF000000000    |
| <i>A. sp.</i> SH024                     | ADCH000000000    |
| <i>A. ursingii</i> DSM 16037            | AIEA000000000    |
