# Supplementary material for: Evolution of a Pathogen: A Comparative Genomics Analysis Identifies a Genetic Pathway to Pathogenesis in Acinetobacter
Source: PubMed Central journal article supplement (PMC3554770; doi:10.1371/journal.pone.0054287), 2013-01-24
Supplement: pone.0054287.s005.pdf [file pone.0054287.s005.pdf]

**Table S3.** Accession and annotation details for genes screened in this study

| Locus tag      | Annotation                                                                     |
|----------------|--------------------------------------------------------------------------------|
| ABAYE1085      | acinetobactin utilization protein BauF                                         |
| ABAYE1086      | acinetobactin biosynthesis protein BasA                                        |
| ABAYE1087      | non-ribosomal peptide synthase                                                 |
| ABAYE1089      | ferric acinetobactin transport system permease                                 |
| ABAYE1090      | ferric acinetobactin transport system permease                                 |
| ABAYE1091      | ferric acinetobactin transport system ATP-binding protein                      |
| ABAYE1092      | ferric acinetobactin binding protein (BauB)                                    |
| ABAYE1093      | ferric acinetobactin receptor (bauA)                                           |
| ABAYE1094      | acinetobactin siderophore biosynthesis protein BasC                            |
| ABAYE1095      | non-ribosomal peptide synthase (BasD)                                          |
| ABAYE1096      | enterobactin synthase subunit E (BasE)                                         |
| ABAYE1102      | thioesterase                                                                   |
| ABAYE1103      | phosphopantetheinyl transferase component of acinetobactin biosynthesis (basI) |
| ABAYE1104      | isochorismate synthetase                                                       |
| ABAYE2001      | ferric siderophore receptor protein                                            |
| ABAYE2002      | demethylmenaquinone methyltransferase                                          |
| ABAYE2003      | hypothetical protein                                                           |
| ABAYE2004      | siderophore biosynthesis protein                                               |
| ABAYE2005      | hypothetical protein                                                           |
| ABAYE2006      | MFS superfamily multidrug resistance protein                                   |
| ABAYE2007      | lysine/ornithine N-monooxygenase                                               |
| ABAYE2008      | siderophore biosynthesis protein                                               |
| ABAYE1644      | ferrisiderophore receptor protein, TonB dependent                              |
| BAM0936        | putative acinetoferrin biosynthesis protein                                    |
| BAM0937        | putative acinetoferrin biosynthesis protein                                    |
| BAM0938        | putative acinetoferrin biosynthesis protein                                    |
| BAM0939        | putative acinetoferrin biosynthesis protein                                    |
| BAM0940        | hypothetical protein                                                           |
| BAM0941        | putative ferric acinetoferrin transporter                                      |
| BAM0942        | putative ferric acinetoferrin receptor                                         |
| BAM0943        | putative acinetoferrin exporter                                                |
| pABIRp15       | OXA-58 oxacillinase                                                            |
| ABX45066       | beta-lactamase OXA-51-like protein                                             |
| ACC97561       | blaOXA-23                                                                      |
| AB57_0550      | transposase                                                                    |
| AB57_2080      | multidrug efflux protein AdeC                                                  |
| ABK1_3039      | multidrug efflux protein AdeJ                                                  |
| AB57_3158      | multidrug efflux protein AdeK                                                  |
| AB57_3156      | multidrug efflux protein AdeL                                                  |
| ABAYE1173      | multidrug ABC transporter                                                      |
| 29_161         | RND family drug transporter                                                    |
| 29_170         | RND family drug transporter                                                    |
| ABAYE1176      | LysR family transcriptional regulator                                          |
| 32_436         | multidrug efflux protein AdeB                                                  |
| 32_431         | AdeA membrane fusion protein                                                   |
| ABX83929       | AdeR                                                                           |
| ABX83930       | AdeS                                                                           |
| IPREF0010_0184 | multidrug efflux pump AbeM                                                     |
