# Supplementary material for: Evolution of a Pathogen: A Comparative Genomics Analysis Identifies a Genetic Pathway to Pathogenesis in Acinetobacter
Source: PubMed Central journal article supplement (PMC3554770; doi:10.1371/journal.pone.0054287), 2013-01-24
Supplement: pone.0054287.s007.pdf [file pone.0054287.s007.pdf]

**Table S5.** Homology of acured genes in the *Acinetobacter calcoaceticus-baumannii* (*Acb*) complex to genes in other bacteria

| feature | locus_tag              | Closest BLAST hit                      | ID (%) | coverage (%) | Closest BLAST hit type    |
|---------|------------------------|----------------------------------------|--------|--------------|---------------------------|
| 1       | ABAYE2283              | <i>Azotobacter vinelandii</i> DJ       | 49     | 92           | soil microbe              |
| 2       | ABAYE0080              | <i>Rhodanobacter</i> sp. 2APBS1        | 67     | 92           | soil microbe              |
| 3       | ABAYE3752              | <i>Spirochaeta smaragdinae</i>         | 25     | 92           | soil microbe              |
| 4       | ABAYE3753              | <i>Verminephrobacter eiseniae</i>      | 43     | 86           | earthworm endosymbiont    |
| 5       | ABAYE3761              | <i>Methylobacter tundripaludum</i>     | 59     | 97           | soil microbe              |
| 6       | ABAYE2829              | <i>Zymomonas mobilis</i>               | 54     | 93           | soil microbe              |
| 7       | ABAYE1524              | <i>Serratia</i> sp. M24T3              | 44     | 89           | nematode symbiont         |
| 8       | ABAYE1477              | <i>Yersinia frederiksenii</i>          | 53     | 89           | pathogen                  |
| 9       | ABAYE2143              | <i>Naumovozyma dairenensis</i>         | 30     | 35           | fungus                    |
| 10      | ABAYE0743              | <i>Microvirga</i> sp. WSM3557          | 34     | 98           | root nodulating bacterium |
| 11      | ABAYE1358              | <i>Pseudomonas syringae</i>            | 49     | 92           | pathogen                  |
| 12      | ABAYE1778              | <i>Gluconobacter morbifer</i>          | 46     | 97           | pathogen                  |
| 13      | ABAYE0223              | <i>Chryseobacterium gleum</i>          | 59     | 94           | pathogen                  |
| 14      | ACICU_01049            | <i>Callithrix jacchus</i>              | 31     | 76           | marmoset                  |
| 15      | ABAYE2708              | <i>Marinobacter adhaerens</i> HP15     | 47     | 49           | diatom aggregate          |
| 16      | HMPREF0022_02462       | <i>Schizophyllum commune</i>           | 37     | 58           | fungus                    |
| 17      | ACICU_02424            | <i>Methylotenera mobilis</i>           | 48     | 97           | sediment microbe          |
| 18      | ABAYE1316              | <i>Pseudomonas stutzeri</i>            | 39     | 96           | pathogen                  |
| 19      | ABAYE2003              | <i>Bacillus aerophilus</i>             | 27     | 83           | environmental microbe     |
| 20      | AbauAB05_010100017737  | <i>Clostridium difficile</i>           | 38     | 80           | pathogen                  |
| 21      | AbauAB059_010100020508 | No hit                                 | N/A    | N/A          | N/A                       |
| 22      | HMPREF0022_00070       | <i>Commensalibacter intestini</i>      | 44     | 59           | gut                       |
| 23      | ABZJ_00026             | <i>Arthrotrys oligospora</i>           | 42     | 51           | fungus                    |
| 24      | AbauAB0_010100001652   | <i>Plasmodium vivax</i>                | 26     | 74           | pathogen                  |
| 25      | ABAYE2456              | <i>Azospirillum brasilense</i>         | 43     | 84           | soil microbe              |
| 26      | HMPREF0021_00524       | No hit                                 | N/A    | N/A          | N/A                       |
| 27      | ABAYE0983              | <i>Serpula lacrymans</i>               | 26     | 67           | fungus                    |
| 28      | ABAYE1931              | <i>Burkholderia gladioli</i>           | 56     | 100          | pathogen                  |
| 29      | HMPREF0012_03541       | <i>Dichelobacter nodosus</i>           | 75     | 100          | pathogen                  |
| 30      | HMPREF0012_00124       | <i>Mesorhizobium alhagi</i>            | 53     | 99           | soil microbe              |
| 31      | HMPREF0012_00560       | <i>Methylophaga aminisulfidivorans</i> | 57     | 92           | marine microbe            |
| 32      | HMPREF0012_00562       | <i>Rhodoferrax ferrireducens</i>       | 53     | 90           | environmental microbe     |
| 33      | HMPREF0023_2071        | <i>Gordonia araii</i>                  | 55     | 99           | pathogen                  |
| 34      | HMPREF0013_03409       | <i>Klebsiella oxytoca</i>              | 64     | 100          | pathogen                  |
| 35      | HMPREF0013_03179       | <i>Serratia plymuthica</i>             | 77     | 97           | opportunistic pathogen    |
| 36      | HMPREF0013_03184       | <i>Psychrobacter</i> sp. 1501          | 52     | 98           | pathogen                  |
| 37      | HMPREF0012_01063       | <i>Myroides odoratus</i>               | 74     | 97           | pathogen                  |
| 38      | HMPREF0026_02170       | <i>Pseudomonas syringae</i>            | 68     | 89           | pathogen                  |
| 39      | HMPREF0026_00688       | <i>Pseudomonas aeruginosa</i>          | 50     | 89           | pathogen                  |
| 40      | HMP0015_2881           | <i>Brenneria</i> sp. EniD312           | 28     | 77           | pathogen                  |
| 41      | HMPREF0026_01273       | <i>Psychrobacter arcticus</i>          | 54     | 92           | soil microbe              |
| 42      | HMPREF0023_2956        | <i>Alcanivorax borkumensis</i>         | 52     | 98           | marine microbe            |
